# Supplementary material for: Two dimensional Janus RuXY (X, Y = Br, Cl, F, I, X ≠ Y) monolayers: ferromagnetic semiconductors with spontaneous valley polarization and tunable magnetic anisotropy
Source: Royal Society of Chemistry journal article supplement (doi:10.1039/d3cp02916f), 2023-01-01
Supplement: d3cp02916f1.pdf [file d3cp02916f1.pdf]

*Electronic Supplementary Information for*

**Two Dimensional Janus RuXY (X, Y = I, Br, Cl, F, X ≠ Y) Monolayers:  
Ferromagnetic Semiconductors with Spontaneous Valley Polarization and  
Tunable Magnetic Anisotropy**

Ziyu Liu,<sup>a</sup> Baozeng Zhou,<sup>a</sup> Xiaocha Wang<sup>a,\*</sup> and Wenbo Mi<sup>b,\*</sup>

*<sup>a</sup>Tianjin Key Laboratory of Film Electronic & Communicate devices, School of Integrated Circuit  
Science and Engineering, Tianjin University of Technology, Tianjin 300384, China*

*<sup>b</sup>Tianjin Key Laboratory of Low Dimensional Materials Physics and Preparation Technology,  
School of Science, Tianjin University, Tianjin 300354, China*

---

\* Author to whom all correspondence should be addressed.

E-mail: [wangxc@email.tjut.edu.cn](mailto:wangxc@email.tjut.edu.cn) and [miwenbo@tju.edu.cn](mailto:miwenbo@tju.edu.cn)

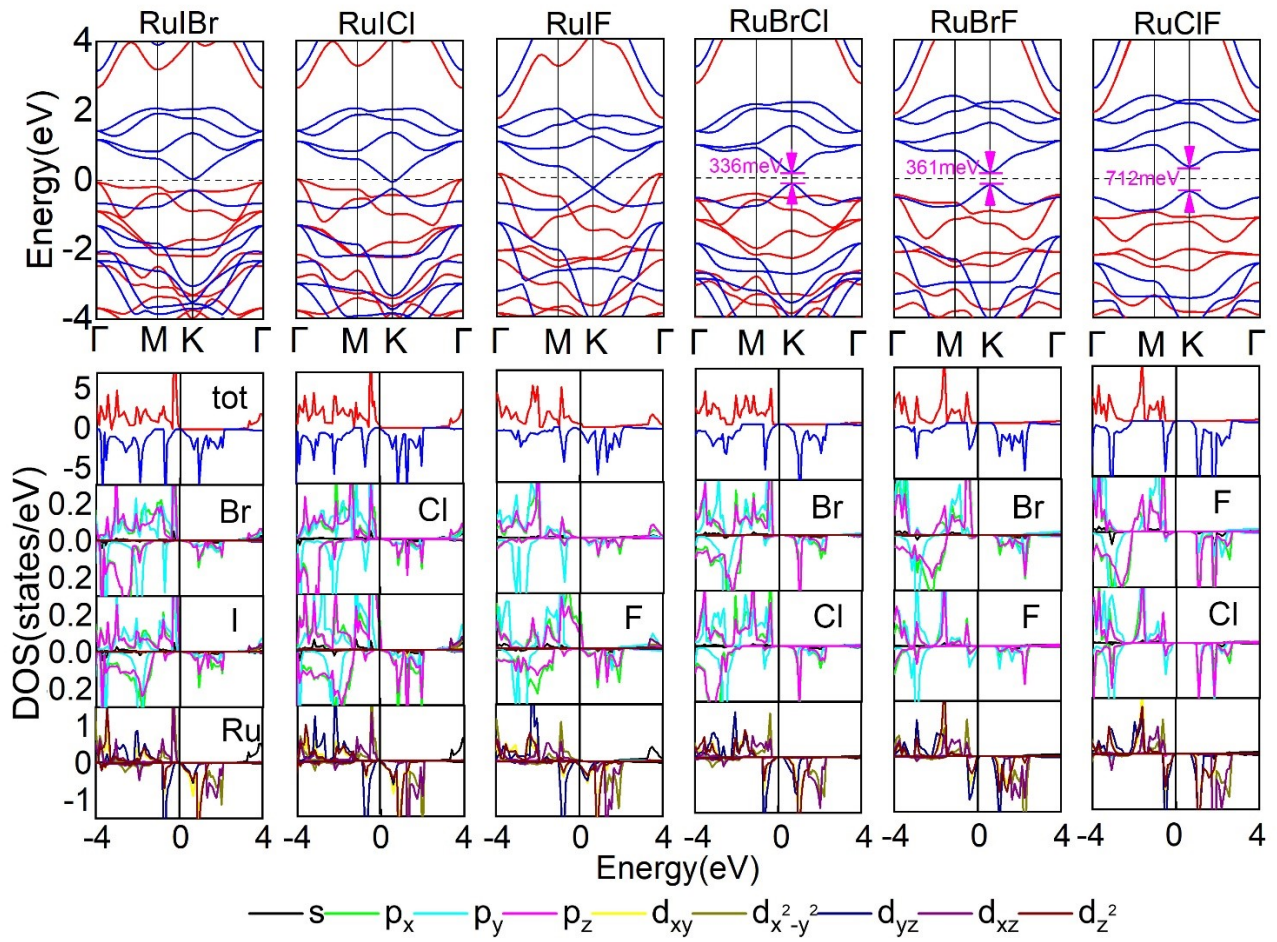

**Fig. S1** The band structures and density of states of Janus RuXY monolayers (X, Y = Br, I, Cl, F, X ≠ Y).

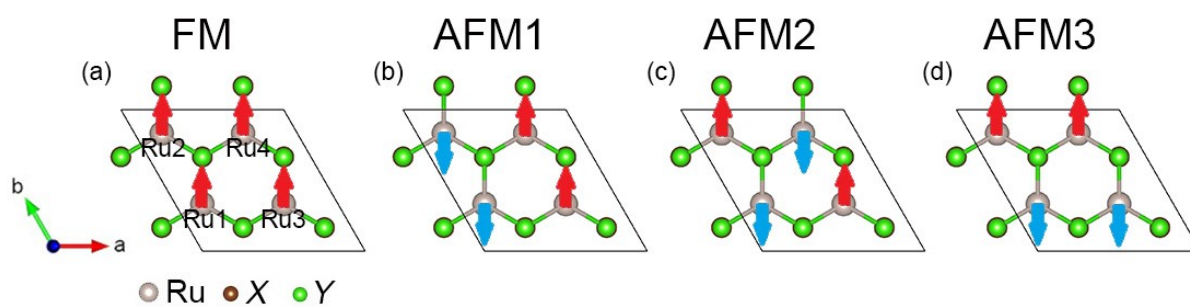

**Fig. S2** The structures of Janus RuXY monolayers in (a) FM, (b) AFM1, (c) AFM2 and (d) AFM3 states. Two colored arrows indicate different spin directions.

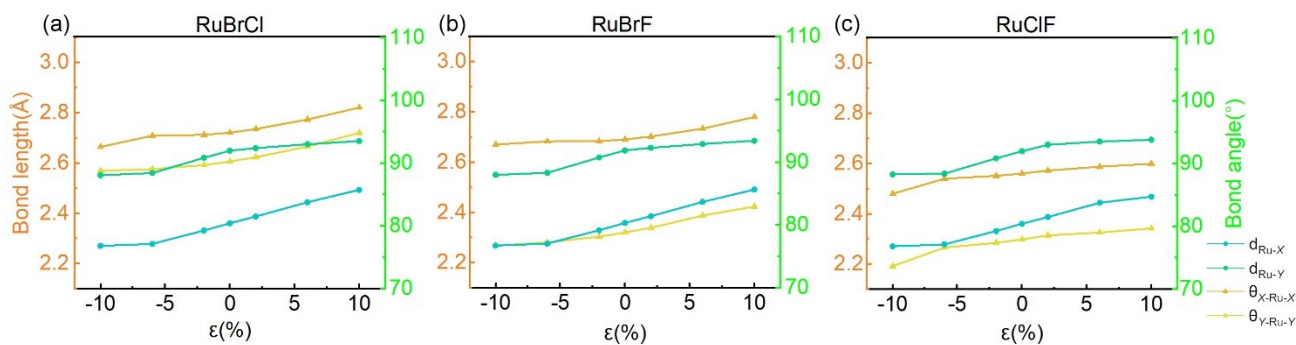

**Fig. S3** Changes in bond length and bond angle of (a) RuBrCl, (b) RuBrF, (c) RuClF monolayers at different biaxial strains.

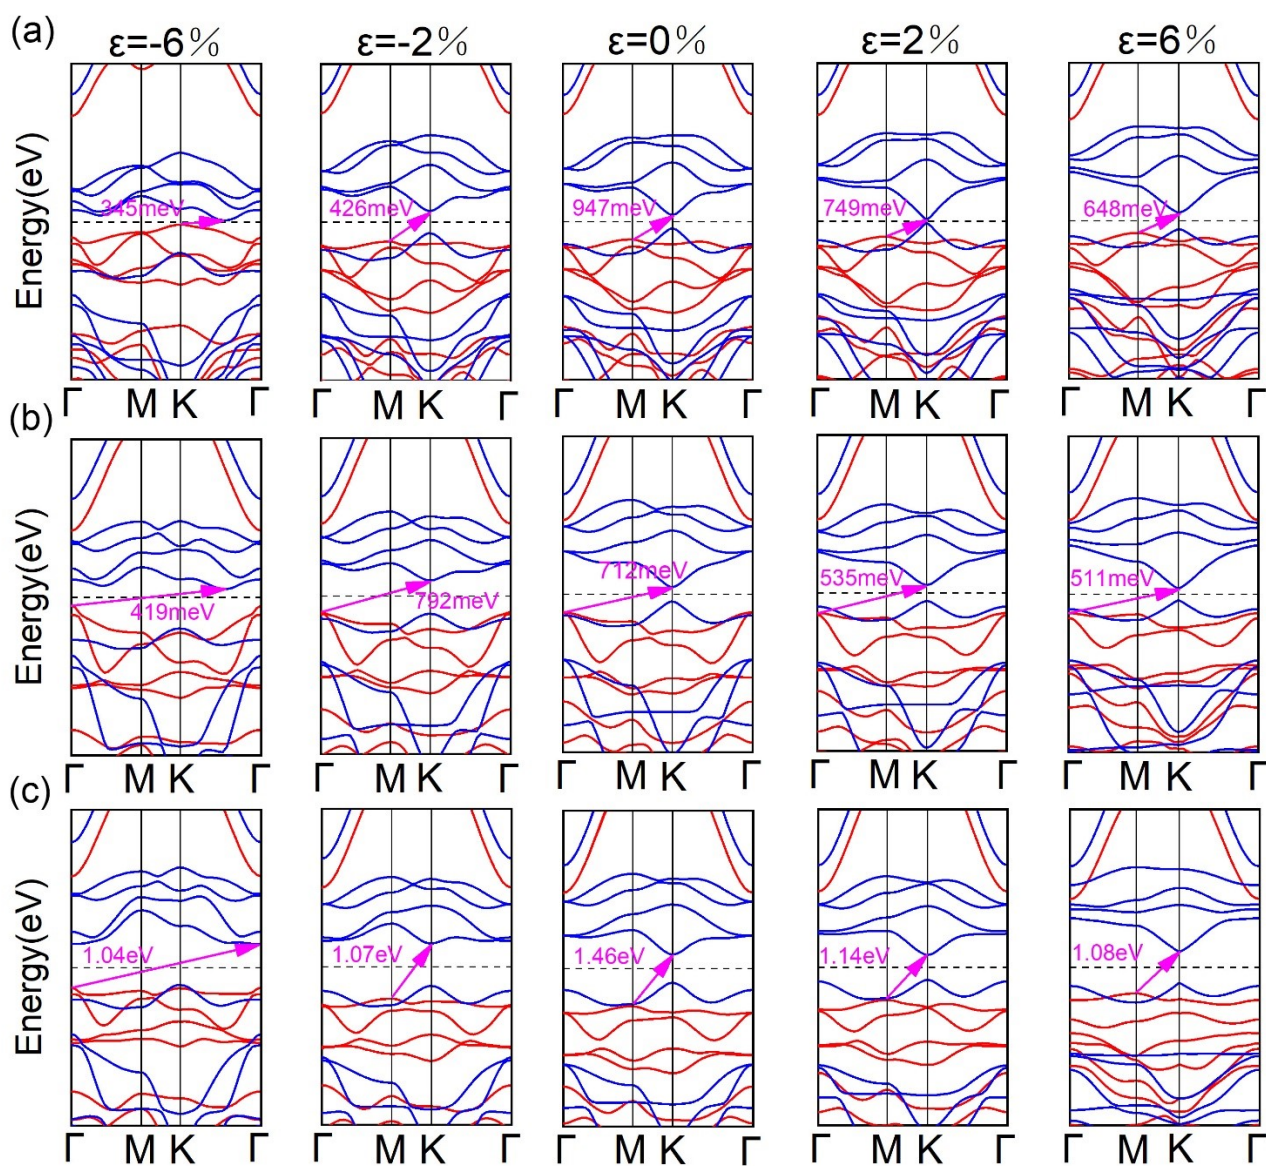

**Fig. S4** The band structures without SOC of (a) RuBrF, (b) RuBrCl and (c) RuClF monolayers at different biaxial strains.



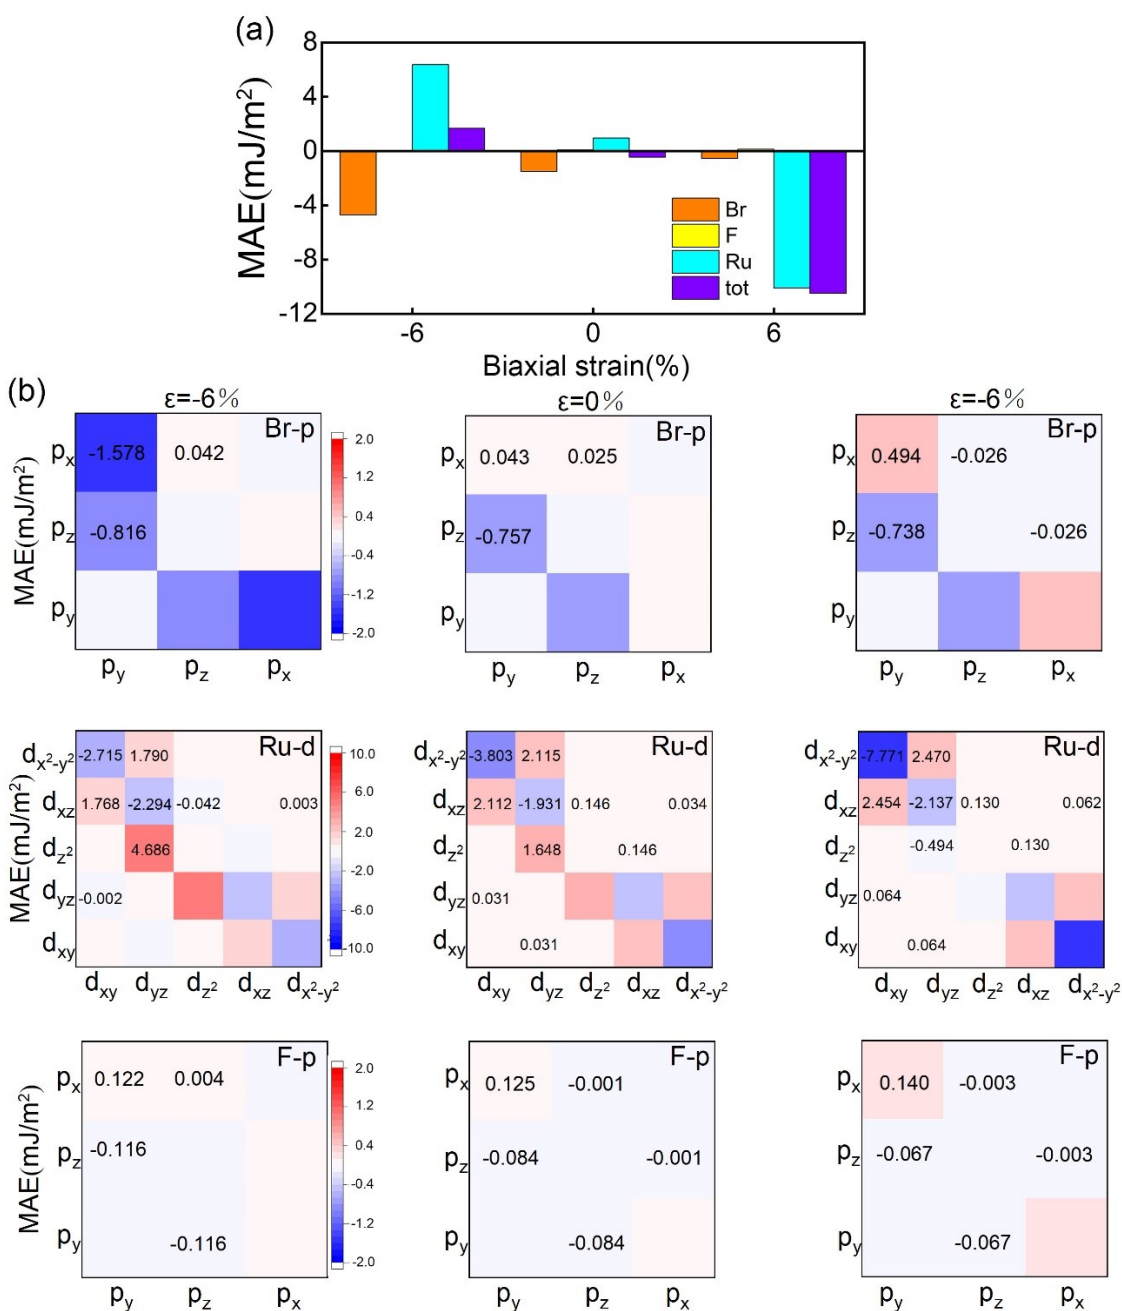

**Fig. S5** (a) Total MAE and (b) the orbital-resolved MAE in RuBrF monolayer at different biaxial strains. The positive and negative values indicate PMA and IMA, respectively.

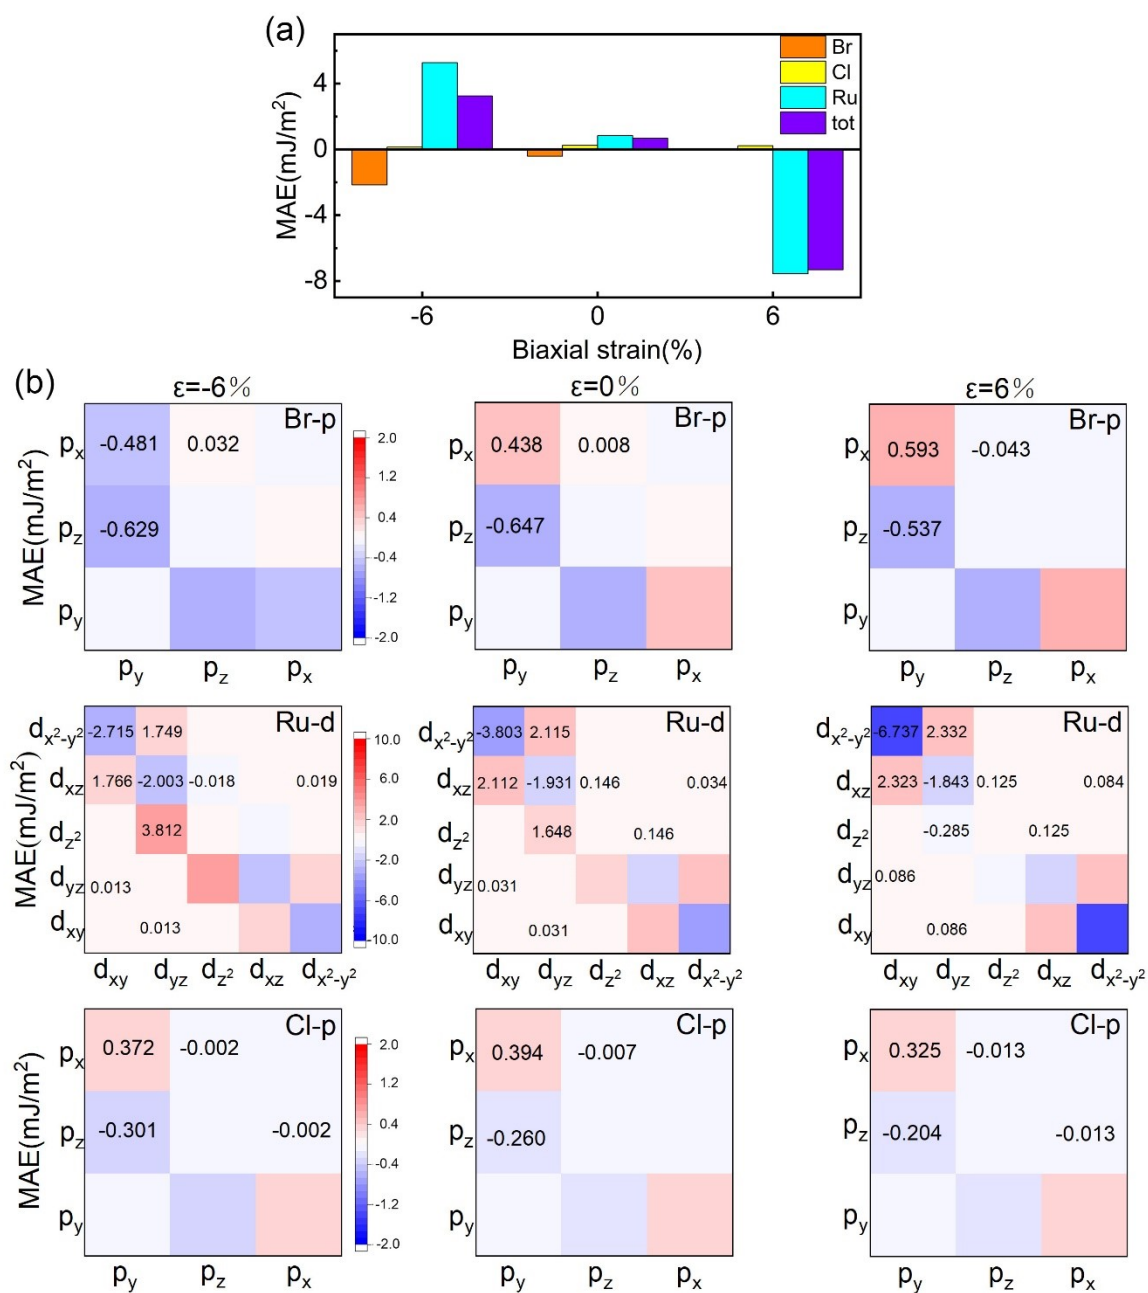

**Fig. S6** (a) Total MAE and (b) the orbital-resolved MAE in RuBrCl monolayer at different biaxial strains. The positive and negative values indicate PMA and IMA, respectively.

**Table S1** The total energy(eV) of the RuXY monolayers with the different magnetic configuration.

|        | $E_{AFM1}$ (eV) | $E_{AFM2}$ (eV) | $E_{AFM3}$ (eV) | $E_{FM}$ (eV) | Magnetic ground state |
|--------|-----------------|-----------------|-----------------|---------------|-----------------------|
| RuIBr  | -37.324         | -37.325         | -37.325         | -37.562       | FM                    |
| RuICl  | /               | /               | /               | /             | /                     |
| RuIF   | /               | /               | /               | /             | /                     |
| RuBrCl | -41.427         | -41.427         | -41.427         | -41.873       | FM                    |
| RuBrF  | -45.916         | -45.916         | -45.916         | -46.695       | FM                    |
| RuClF  | -48.582         | -48.582         | -48.582         | -49.247       | FM                    |
